# Supplementary material for: Investigating the Causal Relationship of C-Reactive Protein with 32 Complex Somatic and Psychiatric Outcomes: A Large-Scale Cross-Consortium Mendelian Randomization Study
Source: PLoS Med. 2016 Jun 21;13(6):e1001976. doi: 10.1371/journal.pmed.1001976 (PMC4915710; doi:10.1371/journal.pmed.1001976)
Supplement: S2 Table — (XLSX) [file pmed.1001976.s011.xlsx]

## Sheet: ST2
	Supplementary Table 2 : CRP lead variants used in the genetic risk score as instrumental variables
	A : CRP gene genetic risk score (ie. GRSCRP)
		Variant dbSNP id	Chromosome	position (GChr36/hg18)	Alleles (raising/ lowering)	Raising AF in European populations	(Nearby) genes	Effect of lead variant on ln (CRP) levels	Standard Error of Effect	Pvalue in respective CRP meta-analysis	Reference (PMID)
		rs3093077	1	157946260	G/T	0.05	CRP	0.207	0.033	5.4e-35	21325005
		rs1205	1	157948857	C/T	0.6667	CRP	0.169	0.016	1e-40	21325005
		rs1130864	1	157949715	T/C	0.3091	CRP	0.127	0.014	1e-40	21325005
		rs1800947	1	157950062	G/C	0.9333	CRP	0.232	0.03	1e-40	21325005
	B : CRP multilocus genetic risk score (ie. GRSGWAS)
		Variant dbSNP id	Chromosome	position (GChr36/hg18)	Alleles (raising/ lowering)	Raising AF in European populations	(Nearby) genes	Effect of lead variant on ln (CRP) levels	Standard Error of Effect	Pvalue in respective CRP meta-analysis	Reference (PMID)
		rs12037222	1	39837548	A/G	0.2373	PABPC4	0.045	0.007	6.4e-11	23034020
		rs4420065	1	65934049	C/T	0.65	LEPR	0.09	0.005	3.5e-62	23034020
		rs4129267	1	152692888	C/T	0.6583	IL6R	0.079	0.005	2.1e-48	23034020
		rs2794520	1	157945440	C/T	0.6667	CRP	0.16	0.006	2e-186	23034020
		rs12239046	1	245668218	C/T	0.65	NLRP3	0.047	0.006	1.2e-15	23034020
		rs1260326	2	27584444	T/C	0.4	GCKR	0.072	0.005	4.6e-40	23034020
		rs6734238	2	113557501	G/A	0.4167	IL1F10	0.05	0.006	1.8e-17	23034020
		rs4705952	5	131867517	G/A	0.1638	IRF1	0.042	0.007	1.3e-08	23034020
		rs6901250	6	117220718	A/G	0.3276	GPRC6A	0.035	0.006	4.8e-08	23034020
		rs13233571	7	72609167	C/T	0.8833	BCL7B	0.054	0.009	3.6e-09	23034020
		rs9987289	8	9220768	G/A	0.925	PPP1R3B	0.069	0.011	3.4e-13	23034020
		rs10745954	12	102007224	A/G	0.4833	ASCL1	0.039	0.006	1.6e-11	23034020
		rs1183910	12	119905190	G/A	0.7083	HNF1A	0.149	0.006	2e-124	23034020
		rs340029	15	58682257	T/C	0.6417	RORA	0.032	0.006	4.1e-09	23034020
		rs10521222	16	49716211	C/T	0.9167	SALL1	0.104	0.015	8.5e-13	23034020
		rs2847281	18	12811593	A/G	0.6271	PTPN2	0.031	0.006	2.2e-08	23034020
		rs4420638	19	50114786	A/G	0.8167	APOC1	0.236	0.009	9e-139	23034020
		rs1800961	20	42475778	C/T	0.95	HNF4A	0.088	0.015	2.2e-09	23034020
