# Supplementary material for: Investigating the Causal Relationship of C-Reactive Protein with 32 Complex Somatic and Psychiatric Outcomes: A Large-Scale Cross-Consortium Mendelian Randomization Study
Source: PLoS Med. 2016 Jun 21;13(6):e1001976. doi: 10.1371/journal.pmed.1001976 (PMC4915710; doi:10.1371/journal.pmed.1001976)
Supplement: S5 Table — (XLSX) [file pmed.1001976.s014.xlsx]

## Sheet: ST6
	Supplementary Table 5. Pathway enrichment results for biologically prioritized candidate gene set associated with CRP used as the input query to the geneset enrichment analysis
	Pathway name	FDR	Genes in pathway	Genes in total network	Proportion of genes observed in respective pathway
	response to type I interferon	6.08162e-09	9	75	0.12
	cellular response to type I interferon	6.08162e-09	9	74	0.121622
	type I interferon signaling pathway	6.08162e-09	9	74	0.121622
	endocrine pancreas development	3.24384e-08	7	34	0.205882
	endocrine system development	4.5412e-08	8	63	0.126984
	pancreas development	1.77926e-07	7	45	0.155556
	glucose homeostasis	3.00451e-06	7	69	0.101449
	carbohydrate homeostasis	3.00451e-06	7	69	0.101449
	regulation of viral genome replication	1.75496e-05	6	51	0.117647
	viral genome replication	6.38457e-05	6	64	0.09375
	interferon-gamma-mediated signaling pathway	0.000129124	6	73	0.0821918
	negative regulation of viral genome replication	0.000140119	5	38	0.131579
	response to virus	0.00022033	8	205	0.0390244
	cellular response to interferon-gamma	0.000334003	6	89	0.0674157
	triglyceride homeostasis	0.000577816	4	22	0.181818
	acylglycerol homeostasis	0.000577816	4	22	0.181818
	response to interferon-gamma	0.000734655	6	105	0.0571429
	regulatory region DNA binding	0.00106439	8	267	0.0299625
	transcription regulatory region DNA binding	0.00106439	8	266	0.0300752
	regulatory region nucleic acid binding	0.00106439	8	267	0.0299625
	negative regulation of viral process	0.00124014	5	65	0.0769231
	lipid homeostasis	0.0017152	5	70	0.0714286
	regulation of viral process	0.00226794	6	134	0.0447761
	negative regulation of multi-organism process	0.00286928	5	79	0.0632911
	regulation of symbiosis, encompassing mutualism through parasitism	0.00292057	6	142	0.0422535
	low-density lipoprotein particle receptor binding	0.00390556	3	12	0.25
	glucose metabolic process	0.00557355	6	161	0.0372671
	very-low-density lipoprotein particle	0.00719641	3	15	0.2
	triglyceride-rich lipoprotein particle	0.00719641	3	15	0.2
	quaternary ammonium group binding	0.00854395	3	16	0.1875
	lipoprotein particle receptor binding	0.00913507	3	17	0.176471
	alcohol binding	0.00913507	4	51	0.0784314
	high-density lipoprotein particle	0.00913507	3	17	0.176471
	hexose metabolic process	0.00913507	6	182	0.032967
	defense response to other organism	0.0103946	6	188	0.0319149
	insulin secretion	0.0120164	5	115	0.0434783
	regulation of fatty acid biosynthetic process	0.0139848	3	20	0.15
	regulation of glucose metabolic process	0.0169773	4	63	0.0634921
	acute-phase response	0.0169773	3	22	0.136364
	plasma lipoprotein particle	0.0169773	3	22	0.136364
	monosaccharide metabolic process	0.0169773	6	209	0.0287081
	protein-lipid complex remodeling	0.017219	3	23	0.130435
	peptide hormone secretion	0.017219	5	131	0.0381679
	macromolecular complex remodeling	0.017219	3	23	0.130435
	regulation of multi-organism process	0.017219	6	215	0.027907
	plasma lipoprotein particle remodeling	0.017219	3	23	0.130435
	protein-lipid complex	0.017219	3	23	0.130435
	acute inflammatory response	0.0172311	4	66	0.0606061
	peptide secretion	0.0184043	5	134	0.0373134
	negative regulation of multicellular organismal process	0.0219777	6	229	0.0262009
	energy reserve metabolic process	0.0241009	5	143	0.034965
	peptide transport	0.025249	5	145	0.0344828
	amide transport	0.0264356	5	147	0.0340136
	regulation of lipid biosynthetic process	0.0286968	4	79	0.0506329
	hormone secretion	0.0286968	5	152	0.0328947
	hormone transport	0.0286968	5	153	0.0326797
	positive regulation of lipid metabolic process	0.0286968	4	78	0.0512821
	plasma lipoprotein particle organization	0.0286968	3	29	0.103448
	positive regulation of neuron differentiation	0.0286968	3	29	0.103448
	protein-lipid complex subunit organization	0.0300768	3	30	0.1
	regulation of cellular carbohydrate metabolic process	0.0302886	4	81	0.0493827
	regulation of lipid metabolic process	0.0357496	5	162	0.0308642
	regulation of carbohydrate metabolic process	0.0387245	4	87	0.045977
	negative regulation of cell differentiation	0.0391476	6	266	0.0225564
	regulation of hormone levels	0.0401523	6	268	0.0223881
	T cell differentiation	0.0421551	4	90	0.0444444
	response to hexose	0.0491677	3	37	0.0810811
	inflammatory response	0.0491677	6	282	0.0212766
	response to monosaccharide	0.0491677	3	37	0.0810811
	negative regulation of inflammatory response	0.0491677	3	37	0.0810811
	response to carbohydrate	0.0638779	3	41	0.0731707
	protein heterodimerization activity	0.0638779	5	190	0.0263158
	transcription initiation from RNA polymerase II promoter	0.0638779	5	189	0.026455
	regulation of insulin secretion	0.065618	4	104	0.0384615
	sequence-specific DNA binding RNA polymerase II transcription factor activity	0.0769876	5	199	0.0251256
	response to interferon-beta	0.0772276	2	9	0.222222
	double-stranded RNA binding	0.0793822	3	45	0.0666667
	regulation of peptide hormone secretion	0.0826294	4	112	0.0357143
	signal release	0.0876055	5	207	0.0241546
	defense response to virus	0.0887431	4	116	0.0344828
	regulation of peptide secretion	0.0887431	4	115	0.0347826
	regulation of energy homeostasis	0.0887431	2	10	0.2
	phosphate ion transmembrane transport	0.0887431	2	10	0.2
	regulation of fatty acid metabolic process	0.090462	3	49	0.0612245
	DNA-templated transcription, initiation	0.090462	5	212	0.0235849
	regulation of peptide transport	0.090462	4	117	0.034188
	alpha-beta T cell activation	0.090462	3	49	0.0612245
	cholesterol homeostasis	0.0938773	3	50	0.06
	sterol homeostasis	0.0938773	3	50	0.06
	triglyceride-rich lipoprotein particle remodeling	0.0981652	2	11	0.181818
	very-low-density lipoprotein particle remodeling	0.0981652	2	11	0.181818
