# Supplementary material for: Investigating the Causal Relationship of C-Reactive Protein with 32 Complex Somatic and Psychiatric Outcomes: A Large-Scale Cross-Consortium Mendelian Randomization Study
Source: PLoS Med. 2016 Jun 21;13(6):e1001976. doi: 10.1371/journal.pmed.1001976 (PMC4915710; doi:10.1371/journal.pmed.1001976)
Supplement: S11 Table — (XLSX) [file pmed.1001976.s020.xlsx]

## Sheet: SCZ 108 loci eQTL
	Supplementary Table 11. Brain and blood eQTL for credible sets of SNPs of the 108 schizophrenia loci
	Source : http://www.ncbi.nlm.nih.gov/pubmed/25056061, taken directly from Supplementary Table 4
	Table 7.a : Brain eQTL														Table 7.b : Blood eQTL
	#	Index SNPs	CredibleSNP	P(cSCZ)	Prob(cSCZ)	N(cSCZ)	eQTL SNP	eQTL gene	P(eQTL)	Prob(eQTL)	eQTLcumsum	PeQTL(SCZ)	R2(cSCZ/eQTL)		#	Index SNPs	CredibleSNP	P(cSCZ)	Prob(cSCZ)	N(cSCZ)	eQTL SNP	eQTL gene	P(eQTL)	Prob(eQTL)	eQTLcumsum	PeQTL(SCZ)	R2(cSCZ/eQTL)
	1	rs115329265	rs115329265	3.861e-32	0.7017	160	rs116076247	HLA-A	1.66e-07	7.94198e-15	1	4.62e-18	0.318983		1	rs115329265	rs115329265	3.861e-32	0.7017	160	rs35030260	HIST1H4L	8.49463e-25	4.64116e-06	0.999729	6.403e-27	0.475453
	2	rs11191419	rs11191419	9.235e-18	0.1409	181	chr10_104623104_D	C10orf32	2.602e-05	3.71395e-13	1	6.461e-06	0.491654		2	rs115329265	rs115329265	3.861e-32	0.7017	160	rs35016036	HIST1H3I	4.62867e-09	5.31951e-06	0.999685	5.58e-27	0.461803
	3	rs11191419	rs11191419	9.235e-18	0.1409	181	chr10_104623104_D	AS3MT	5.136e-07	3.71395e-13	1	6.461e-06	0.491654		3	rs115329265	rs115329265	3.861e-32	0.7017	160	rs213240	RP5-874C20.3	2.41655e-09	3.63249e-22	1	1.349e-10	0.306402
	4	rs2851447	rs2851447	2.189e-14	0.1205	40	rs11614406	OGFOD2	2.648e-05	8.90787e-10	1	4.817e-06	0.530315		4	rs11191419	rs11191419	9.235e-18	0.1409	181	rs7096169	AS3MT	6.68604e-19	0.027664	0.674331	4.807e-17	0.854587
	5	rs75968099	rs75968099	3.386e-12	0.2173	30	rs9876421	MLH1	8.526e-05	0.103445	0.320744	7.22e-12	0.958171		5	rs11191419	rs11191419	9.235e-18	0.1409	181	chr10_104619292_I	C10orf32	6.38195e-69	2.44738e-13	1	9.995e-06	0.52045
	6	rs75968099	rs75968099	3.386e-12	0.2173	30	rs78136662	LRRFIP2	1.946e-08	4.94873e-05	0.999834	1.821e-08	0.681897		6	rs11191419	rs11191419	9.235e-18	0.1409	181	rs7090337	WBP1L	1.09675e-28	2.12798e-08	1	7.997e-11	0.25971
	7	rs75059851	rs75059851	1.232e-11	0.08478	34	rs78510304	B3GAT1	3.146e-05	2.36358e-09	1	0.0008499	0.124586		7	rs11191419	rs11191419	9.235e-18	0.1409	181	rs1163238	SFR1	2.35845e-06	4.14476e-09	1	4.267e-10	0.230592
	8	rs2535627	rs2535627	3.956e-11	0.1228	141	rs2878632	GNL3	6.689e-07	0.00259311	0.913099	2.056e-09	0.614992		8	rs11191419	rs11191419	9.235e-18	0.1409	181	rs4409766	SFXN2	2.78596e-06	8.58244e-08	1	1.923e-11	0.185358
	9	rs2535627	rs2535627	3.956e-11	0.1228	141	rs2240919	PPM1M	7.198e-07	2.3355e-05	0.997165	2.635e-07	0.501187		9	rs11191419	rs11191419	9.235e-18	0.1409	181	chr10_104653242_I	USMG5	6.60611e-06	4.30628e-06	0.999952	3.548e-13	0.156787
	10	rs7432375	rs7432375	5.274e-11	0.09383	83	rs1394094	TMEM22	1.23e-06	0.000317601	0.995774	1.803e-08	0.443941		10	rs11191419	rs11191419	9.235e-18	0.1409	181	rs55994728	SH3PXD2A	7.24783e-05	1.03119e-10	1	1.895e-08	0.153076
	11	rs140505938	rs140505938	9.337e-10	0.0175	253	rs72694962	POGZ	2.437e-07	0.00209622	0.8931	8.254e-09	0.900674		11	rs2851447	rs2851447	2.189e-14	0.1205	40	chr12_123672960_I	C12orf65	5.51967e-06	5.12555e-08	0.999999	7.187e-08	0.716803
	12	rs140505938	rs140505938	9.337e-10	0.0175	253	rs55963510	SLC27A3	5.843e-05	0.000144044	0.988584	1.305e-07	0.808381		12	rs2851447	rs2851447	2.189e-14	0.1205	40	rs28450974	SBNO1	4.60864e-47	4.14795e-07	0.999986	8.334e-09	0.711633
	13	rs2973155	rs2973155	1.016e-09	0.2027	52	rs2118793	G3BP1	5.383e-06	4.09523e-05	0.997098	6.689e-06	0.516953		13	rs2851447	rs2851447	2.189e-14	0.1205	40	chr12_123598265_I	ARL6IP4	5.63925e-11	4.03614e-11	1	0.0001247	0.375616
	14	rs1498232	rs1498232	1.284e-09	0.1538	34	rs2015244	TINAGL1	2.936e-05	0.139356	0.439892	1.421e-09	0.982946		14	rs2851447	rs2851447	2.189e-14	0.1205	40	rs2337632	OGFOD2	7.55938e-09	5.2411e-11	1	9.454e-05	0.268791
	15	rs1498232	rs1498232	1.284e-09	0.1538	34	rs16833076	AK2	3.085e-05	3.56583e-06	0.999924	8.281e-05	0.346437		15	rs2851447	rs2851447	2.189e-14	0.1205	40	rs12423255	RILPL2	4.10662e-13	5.98778e-12	1	0.0009596	0.138811
	16	rs6002655	rs6002655	1.475e-09	0.1472	207	rs3021080	NAGA	2.576e-11	0.00306394	0.79779	7.932e-08	0.540265		16	chr7_2025096_I	chr7_2025096_I	6.123e-14	0.1677	40	rs10256815	NUDT1	1.13351e-05	5.04091e-11	1	0.0004112	0.197802
	17	rs11685299	rs11685299	1.109e-08	0.06846	44	chr2_225403738_I	CUL3	2.607e-05	0.0013738	0.996439	6.285e-07	0.7716		17	rs12887734	rs12887734	1.172e-13	0.1372	112	chr14_104029188_I	APOPT1	5.99131e-09	0.000240269	0.99372	7.594e-11	0.789114
	18	rs8044995	rs8044995	3.268e-08	0.0602	71	rs255049	NIP7	2.252e-05	0.000910593	0.974364	2.51e-06	0.736766		18	rs12887734	rs12887734	1.172e-13	0.1372	112	rs61637848	KLC1	1.02127e-27	0.00369549	0.8821	4.658e-12	0.582472
	19	rs8044995	rs8044995	3.268e-08	0.0602	71	chr16_68243884_I	PRMT7	6.886e-05	0.00018866	0.993113	1.3e-05	0.630317		19	rs12887734	rs12887734	1.172e-13	0.1372	112	rs10149470	EIF5	2.96335e-17	5.05363e-11	1	0.0006558	0.236323
	20	rs1023500	rs1023500	5.043e-08	0.1338	26	rs5996091	CENPM	5.744e-08	0.000132491	0.996944	6.804e-05	0.482265		20	rs12887734	rs12887734	1.172e-13	0.1372	112	rs7154587	BAG5	1.38798e-167	5.68288e-10	1	4.994e-05	0.213374
	21	rs9420	rs9420	6.652e-08	0.0508	90	rs111336205	MED19	3.356e-05	0.000667654	0.989844	5.964e-06	0.173703		21	rs4391122	rs4391122	1.734e-13	0.2998	58	rs4546329	C5orf43	2.70474e-05	0.106315	0.543809	4.983e-13	0.958518
	22	rs9420	rs9420	6.652e-08	0.0508	90	rs111336205	TMX2	2.885e-05	0.000667654	0.989844	5.964e-06	0.173703		22	rs4391122	rs4391122	1.734e-13	0.2998	58	rs1445976	ZSWIM6	3.9071e-08	0.00141949	0.972398	4.071e-11	0.608844
	23	rs9420	rs9420	6.652e-08	0.0508	90	rs12362406	TIMM10	1.317e-16	9.93463e-06	0.999646	0.0005085	0.149886		23	rs4391122	rs4391122	1.734e-13	0.2998	58	chr5_60542205_I	ELOVL7	9.09176e-08	1.37673e-10	1	0.0007826	0.127212
	24	rs56873913	rs56873913	2.188e-07	0.1046	88	rs10418197	NUCB1	8.202e-05	0.00226315	0.965991	1.182e-05	0.901332		24	rs13240464	rs13240464	6.162e-13	0.2381	57	rs11766326	IMMP2L	7.75007e-05	2.73435e-05	0.99986	6.594e-09	0.493103
	25	rs56873913	rs56873913	2.188e-07	0.1046	88	rs10418197	SEPW1	1.15e-05	0.00226315	0.965991	1.182e-05	0.901332		25	rs8042374	rs8042374	1.865e-12	0.1537	30	rs10851907	CTSH	1.81175e-13	1.86661e-07	0.999998	2.238e-06	0.268781
	26	rs56873913	rs56873913	2.188e-07	0.1046	88	rs2288920	LIG1	3.507e-05	0.0104346	0.776123	2.395e-06	0.761755		26	rs8042374	rs8042374	1.865e-12	0.1537	30	rs10519203	PSMA4	1.70158e-09	7.38514e-08	0.999999	5.887e-06	0.195595
	27	chr5_140143664_I	chr5_140143664_I	3.596e-07	0.02476	356	rs2531351	SRA1	2.632e-07	0.0018103	0.861713	5.461e-06	0.908236		27	rs8042374	rs8042374	1.865e-12	0.1537	30	rs8034191	IREB2	8.13529e-66	1.73024e-07	0.999998	2.422e-06	0.192107
	28	chr5_140143664_I	chr5_140143664_I	3.596e-07	0.02476	356	rs2563285	WDR55	1.538e-10	0.00255322	0.818101	3.814e-06	0.857565		28	rs4702	rs4702	2.298e-12	0.957	6	rs8039305	FES	6.17308e-09	0.0035562	0.984885	6.998e-10	0.709396
	29	chr5_140143664_I	chr5_140143664_I	3.596e-07	0.02476	356	chr5_140154654_I	NDUFA2	2.173e-05	0.000422377	0.958539	2.509e-05	0.781755		29	rs4702	rs4702	2.298e-12	0.957	6	rs6226	MAN2A2	9.90122e-05	0.000167763	0.999023	1.612e-08	0.587891
	30	chr5_140143664_I	chr5_140143664_I	3.596e-07	0.02476	356	chr5_140079408_D	C5orf32	5.03e-05	0.000733285	0.946871	1.406e-05	0.7731		30	rs10791097	rs10791097	2.876e-12	0.1911	12	rs11222371	SNX19	1.57382e-63	5.15947e-07	0.999997	1.517e-06	0.440728
															31	rs6704768	rs6704768	3.148e-12	0.1289	94	rs4973055	KCNJ13	2.15644e-15	2.06984e-09	1	0.0003657	0.359052
															32	rs75968099	rs75968099	3.386e-12	0.2173	30	rs55690320	LRRFIP2	1.16162e-25	0.000246253	0.998357	3.496e-09	0.861031
															33	rs55661361	rs55661361	3.678e-12	0.5562	2	rs2075713	VSIG2	1.15803e-07	2.75489e-08	1	0.0001296	0.435087
															34	rs9607782	rs9607782	6.763e-12	0.9254	30	rs6002310	NAGA	7.71774e-05	3.21808e-06	0.999938	2.789e-06	0.617356
															35	rs9607782	rs9607782	6.763e-12	0.9254	30	rs9611540	TEF	4.87816e-19	3.09921e-05	0.999609	2.654e-07	0.605453
															36	rs9607782	rs9607782	6.763e-12	0.9254	30	rs9611540	MEI1	2.00364e-07	3.09921e-05	0.999609	2.654e-07	0.605453
															37	rs9607782	rs9607782	6.763e-12	0.9254	30	rs5758209	MCHR1	1.11853e-14	7.37706e-07	0.99999	1.3e-05	0.276482
															38	rs6434928	rs6434928	1.478e-11	0.1138	115	rs4685	SF3B1	1.3932e-123	0.0212756	0.535877	8.199e-11	0.800458
															39	rs6434928	rs6434928	1.478e-11	0.1138	115	chr2_198185513_I	ANKRD44	7.41359e-10	0.000411632	0.981764	4.677e-09	0.545467
															40	rs6434928	rs6434928	1.478e-11	0.1138	115	chr2_198572076_I	MARS2	1.37077e-08	2.90838e-08	1	9.65e-05	0.281157
															41	rs6434928	rs6434928	1.478e-11	0.1138	115	rs144930737	BOLL	6.59019e-08	5.06661e-09	1	0.000622	0.193542
															42	rs6434928	rs6434928	1.478e-11	0.1138	115	rs13027136	PLCL1	7.11533e-22	1.52644e-08	1	0.0001913	0.173744
															43	chr11_46350213_D	chr11_46350213_D	1.967e-11	0.2507	108	rs61884275	MTCH2	4.60088e-09	1.09632e-07	0.999996	7.351e-05	0.192197
															44	chr22_39987017_D	chr22_39987017_D	2.204e-11	0.1105	52	rs132585	SYNGR1	7.58969e-05	0.000590741	0.993972	4.679e-09	0.557181
															45	rs7893279	rs7893279	3.562e-11	0.149	20	rs11592092	ARL5B	1.58963e-09	7.48686e-06	0.999956	9.417e-07	0.584628
															46	rs2535627	rs2535627	3.956e-11	0.1228	141	rs4282054	WDR82	1.06671e-88	1.11374e-05	0.998871	5.676e-07	0.666495
															47	rs2535627	rs2535627	3.956e-11	0.1228	141	rs1010554	NEK4	1.06086e-06	1.37147e-05	0.998608	4.574e-07	0.649875
															48	rs2535627	rs2535627	3.956e-11	0.1228	141	rs34341238	GLYCTK	2.56352e-07	1.13675e-06	0.999973	6.105e-06	0.511489
															49	rs2535627	rs2535627	3.956e-11	0.1228	141	rs13621	STAB1	3.54687e-23	8.29264e-07	0.999979	8.49e-06	0.465462
															50	rs2535627	rs2535627	3.956e-11	0.1228	141	rs10510760	SPCS1	6.92057e-05	3.48196e-05	0.995939	1.743e-07	0.454893
															51	rs2535627	rs2535627	3.956e-11	0.1228	141	chr3_52572841_D	PPM1M	2.30595e-05	7.53378e-07	0.999982	9.387e-06	0.451298
															52	rs2535627	rs2535627	3.956e-11	0.1228	141	rs2276817	ITIH4	1.06129e-35	0.000129514	0.990881	4.488e-08	0.31148
															53	rs2535627	rs2535627	3.956e-11	0.1228	141	rs79888178	GNL3	4.33174e-09	3.89461e-08	1	0.0002136	0.186215
															54	rs7432375	rs7432375	5.274e-11	0.09383	83	chr3_136337628_D	PCCB	2.24469e-08	0.000353235	0.99511	1.616e-08	0.699704
															55	chr3_180594593_I	chr3_180594593_I	5.349e-11	0.03554	213	rs9872669	DNAJC19	4.4267e-05	2.40296e-06	0.999952	1.046e-06	0.506319
															56	rs6065094	rs6065094	5.519e-11	0.2199	59	rs2757521	ACTR5	1.25434e-15	6.79148e-05	0.999065	2.235e-07	0.494919
															57	rs7907645	rs7907645	5.819e-11	0.7721	42	rs7907645	NT5C2	2.49602e-07	0.772103	0.772103	5.819e-11	1
															58	rs7907645	rs7907645	5.819e-11	0.7721	42	rs7907645	SUFU	5.81518e-06	0.772103	0.772103	5.819e-11	1
															59	rs7907645	rs7907645	5.819e-11	0.7721	42	rs7907645	WBP1L	5.41391e-05	0.772103	0.772103	5.819e-11	1
															60	rs950169	rs950169	7.62e-11	0.03592	224	rs12913702	ZNF592	9.7865e-15	0.0022632	0.891888	1.293e-09	0.732527
															61	rs12691307	rs12691307	1.298e-10	0.05349	69	rs7542	ITGAL	3.58059e-05	4.07721e-07	0.999998	2.529e-05	0.417595
															62	rs11210892	rs11210892	4.97e-10	0.241	10	rs673253	MED8	6.36968e-10	5.62877e-06	0.9997	3.093e-05	0.183861
															63	rs4766428	rs4766428	7.093e-10	0.9157	24	rs4766428	FAM216A	2.88277e-06	0.915725	0.915725	7.093e-10	1
															64	rs4766428	rs4766428	7.093e-10	0.9157	24	rs4766428	GPN3	3.71552e-11	0.915725	0.915725	7.093e-10	1
															65	rs4766428	rs4766428	7.093e-10	0.9157	24	rs4766428	VPS29	4.4458e-05	0.915725	0.915725	7.093e-10	1
															66	rs140505938	rs140505938	9.337e-10	0.0175	253	rs3118119	ANP32E	4.46812e-21	0.000806959	0.969675	2.205e-08	0.864706
															67	rs140505938	rs140505938	9.337e-10	0.0175	253	rs34755378	FAM63A	3.02312e-07	0.000180095	0.987791	1.036e-07	0.629661
															68	rs140505938	rs140505938	9.337e-10	0.0175	253	rs3118125	CTSK	1.06086e-06	3.99693e-07	0.999992	6.058e-05	0.365705
															69	rs140505938	rs140505938	9.337e-10	0.0175	253	rs79427717	CTSS	3.67079e-08	6.45702e-06	0.999878	3.274e-06	0.259392
															70	rs140505938	rs140505938	9.337e-10	0.0175	253	rs79427717	ENSA	4.99203e-05	6.45702e-06	0.999878	3.274e-06	0.259392
															71	rs6002655	rs6002655	1.475e-09	0.1472	207	chr22_42474678_I	C22orf32	9.99999999999997e-311	0.00117993	0.8935	2.127e-07	0.253171
															72	chr1_8424984_D	chr1_8424984_D	2.025e-09	0.1153	44	rs301805	RERE	6.23965e-60	0.000735835	0.993586	3.709e-07	0.352153
															73	rs3849046	rs3849046	4.833e-09	0.1642	53	rs154075	HSPA9	1.16087e-11	0.0109146	0.806432	7.889e-08	0.785785
															74	rs8082590	rs8082590	6.841e-09	0.04638	283	rs11871231	GID4	6.70062e-10	0.00279429	0.779517	1.238e-07	0.878289
															75	rs8082590	rs8082590	6.841e-09	0.04638	283	chr17_17973896_D	DRG2	4.10488e-06	9.37485e-05	0.998844	4.2e-06	0.712595
															76	rs8082590	rs8082590	6.841e-09	0.04638	283	rs6502629	SREBF1	5.26354e-06	0.00091319	0.913871	3.939e-07	0.548728
															77	rs8082590	rs8082590	6.841e-09	0.04638	283	rs12943914	SHMT1	3.81895e-06	0.00142358	0.88096	2.487e-07	0.522841
															78	rs8082590	rs8082590	6.841e-09	0.04638	283	rs12453825	TOM1L2	1.5995e-09	4.86577e-06	0.999971	9.395e-05	0.392936
															79	rs2905426	rs2905426	6.921e-09	0.03287	127	rs1808653	GATAD2A	6.97294e-185	0.00847861	0.7017	2.792e-08	0.7969
															80	rs2905426	rs2905426	6.921e-09	0.03287	127	rs7245983	LPAR2	5.27041e-37	0.00574028	0.869084	4.174e-08	0.770452
															81	rs2905426	rs2905426	6.921e-09	0.03287	127	rs2965187	GMIP	1.17028e-08	0.00280169	0.935864	8.751e-08	0.407644
															82	rs10520163	rs10520163	1.02e-08	0.07007	153	rs35951896	CLCN3	6.18408e-249	5.53894e-05	0.997788	1.684e-05	0.44753
															83	rs11685299	rs11685299	1.109e-08	0.06846	44	chr2_225448997_I	CUL3	2.76032e-22	0.00645548	0.985282	1.266e-07	0.898004
															84	rs1106568	rs1106568	1.145e-08	0.2892	24	rs7688623	GPM6A	1.20183e-09	0.000234132	0.9945	1.848e-05	0.466071
															85	rs12325245	rs12325245	1.149e-08	0.1105	79	rs71375980	SETD6	2.06264e-05	2.36722e-05	0.999321	7.523e-05	0.535661
															86	rs12325245	rs12325245	1.149e-08	0.1105	79	rs154438	CNOT1	5.32759e-145	0.000494652	0.985297	3.1e-06	0.122967
															87	rs10803138	rs10803138	1.788e-08	0.1987	129	rs2992632	SDCCAG8	2.75353e-25	0.0203041	0.608592	1.882e-07	0.85722
															88	rs10803138	rs10803138	1.788e-08	0.1987	129	rs2992632	CEP170	1.14708e-15	0.0203041	0.608592	1.882e-07	0.85722
															89	rs73229090	rs73229090	1.952e-08	0.1198	22	rs59339059	EPHX2	2.02327e-08	0.00159154	0.990831	1.707e-06	0.517543
															90	rs832187	rs832187	2.584e-08	0.1322	36	rs3774729	ATXN7	5.63006e-28	0.00370608	0.973458	1.042e-06	0.642552
															91	chr1_243881945_I	chr1_243881945_I	3.109e-08	0.07752	122	rs6656918	AKT3	1.84161e-10	7.12724e-05	0.997386	4.484e-05	0.228901
															92	rs8044995	rs8044995	3.268e-08	0.0602	71	rs12599178	DUS2L	2.86355e-17	0.000977624	0.970651	2.331e-06	0.841064
															93	rs8044995	rs8044995	3.268e-08	0.0602	71	rs8046975	DPEP3	8.64913e-17	0.000639664	0.98631	3.627e-06	0.836236
															94	rs8044995	rs8044995	3.268e-08	0.0602	71	rs11043	ESRP2	2.66642e-39	6.42675e-05	0.998246	4.031e-05	0.754389
															95	rs8044995	rs8044995	3.268e-08	0.0602	71	rs146250480	SMPD3	4.92833e-05	0.000145834	0.994131	1.703e-05	0.701694
															96	rs8044995	rs8044995	3.268e-08	0.0602	71	rs2107369	NFATC3	2.22335e-21	5.31965e-06	0.999723	0.0005694	0.594902
															97	rs8044995	rs8044995	3.268e-08	0.0602	71	rs1075851	SLC7A6	1.05644e-39	1.25079e-05	0.999163	0.0002282	0.167172
															98	rs8044995	rs8044995	3.268e-08	0.0602	71	rs78962063	PSMB10	8.42421e-05	3.22509e-06	0.999965	0.000976	0.145441
															99	rs56205728	rs56205728	4.92e-08	0.4937	15	rs2305649	PLCB2	1.46424e-07	9.60119e-05	0.999399	0.000374	0.391993
															100	rs56205728	rs56205728	4.92e-08	0.4937	15	rs4924451	C15orf57	8.36839e-08	0.00046908	0.998829	6.928e-05	0.0938934
															101	rs1023500	rs1023500	5.043e-08	0.1338	26	rs6002555	SREBF2	7.55938e-09	0.00230997	0.977005	3.391e-06	0.944849
															102	rs1023500	rs1023500	5.043e-08	0.1338	26	rs5996096	C22orf32	3.78906e-231	0.000355435	0.995431	2.405e-05	0.737986
															103	rs1023500	rs1023500	5.043e-08	0.1338	26	rs112045239	NAGA	2.1392e-10	1.21905e-05	0.999955	0.0008666	0.469897
															104	rs1023500	rs1023500	5.043e-08	0.1338	26	rs112045239	MEI1	1.41293e-09	1.21905e-05	0.999955	0.0008666	0.469897
															105	rs1023500	rs1023500	5.043e-08	0.1338	26	rs112045239	PHF5A	4.90727e-05	1.21905e-05	0.999955	0.0008666	0.469897
															106	rs1023500	rs1023500	5.043e-08	0.1338	26	chr22_42351059_I	DESI1	2.47574e-05	1.54032e-05	0.999832	0.0006736	0.392936
															107	rs1023500	rs1023500	5.043e-08	0.1338	26	rs60751895	TCF20	8.6012e-05	2.06724e-05	0.999109	0.0004911	0.344078
															108	rs1023500	rs1023500	5.043e-08	0.1338	26	chr22_42338949_I	CYP2D6	3.14093e-05	2.38412e-05	0.999066	0.0004215	0.331882
															109	rs9420	rs9420	6.652e-08	0.0508	90	rs11229113	C11orf31	4.16275e-23	0.0333287	0.0841296	1.028e-07	1
															110	rs9420	rs9420	6.652e-08	0.0508	90	rs674094	TMX2	5.26354e-06	0.0105957	0.748787	3.364e-07	0.854623
															111	rs9420	rs9420	6.652e-08	0.0508	90	rs731384	SERPING1	1.32767e-15	0.000328423	0.995405	1.253e-05	0.722725
															112	rs9420	rs9420	6.652e-08	0.0508	90	chr11_57593220_I	ZDHHC5	4.66381e-14	6.88522e-06	0.999917	0.0007541	0.262682
															113	rs9420	rs9420	6.652e-08	0.0508	90	rs2926664	TIMM10	5.66263e-63	2.00981e-05	0.999142	0.0002394	0.13338
															114	rs679087	rs679087	7.058e-08	0.1483	46	chr12_29930040_I	TMTC1	2.94495e-66	0.000651271	0.99584	1.996e-05	0.227377
															115	rs190065944	rs190065944	7.221e-08	0.9522	15	rs190065944	IREB2	5.47275e-60	0.952249	0.952249	7.221e-08	1
															116	rs190065944	rs190065944	7.221e-08	0.9522	15	rs190065944	PSMA4	2.74774e-09	0.952249	0.952249	7.221e-08	1
															117	rs190065944	rs190065944	7.221e-08	0.9522	15	rs190065944	CTSH	4.9851e-12	0.952249	0.952249	7.221e-08	1
															118	rs7267348	rs7267348	1.182e-07	0.1436	38	rs6019880	ZNFX1-AS1	3.72795e-06	0.0210845	0.825459	8.623e-07	0.968874
															119	rs14403	rs14403	1.305e-07	0.2361	16	rs2994328	AKT3	2.16809e-13	0.000201708	0.999621	0.0002112	0.730969
															120	rs14403	rs14403	1.305e-07	0.2361	16	rs72759890	SDCCAG8	2.6907e-12	0.000158596	0.999952	0.0002729	0.394288
															121	rs7523273	rs7523273	1.609e-07	0.1485	47	rs2761434	CD46	1.49836e-30	0.000183777	0.995433	0.0001766	0.498595
															122	rs324017	rs324017	2.128e-07	0.4419	6	rs324010	STAT6	9.99999999999997e-311	0.000212354	0.999677	0.0006483	0.439007
															123	rs324017	rs324017	2.128e-07	0.4419	6	rs4759272	STAT2	5.89437e-05	0.000279761	0.999232	0.0004822	0.148001
															124	rs56873913	rs56873913	2.188e-07	0.1046	88	rs7247266	IRF3	8.00906e-13	0.00131327	0.974664	2.092e-05	0.265918
															125	chr5_140143664_I	chr5_140143664_I	3.596e-07	0.02476	356	chr5_140158239_D	HARS	5.86942e-05	0.000206658	0.9899	5.327e-05	0.77626
															126	chr5_140143664_I	chr5_140143664_I	3.596e-07	0.02476	356	rs60115373	SRA1	5.13314e-82	0.000312742	0.973052	3.442e-05	0.752348
															127	chr5_140143664_I	chr5_140143664_I	3.596e-07	0.02476	356	rs1962648	IK	3.59615e-33	0.00108143	0.909754	9.359e-06	0.744972
															128	chr5_140143664_I	chr5_140143664_I	3.596e-07	0.02476	356	rs2337515	ZMAT2	4.51819e-06	2.26488e-05	0.999309	0.0005595	0.391942
